# Supplementary material
Source: Springer Nature journal article supplement (https://www.springermedizin.de/resource/supplementary/12891_2012_2054_MOESM1_ESM.pdf/9510200)

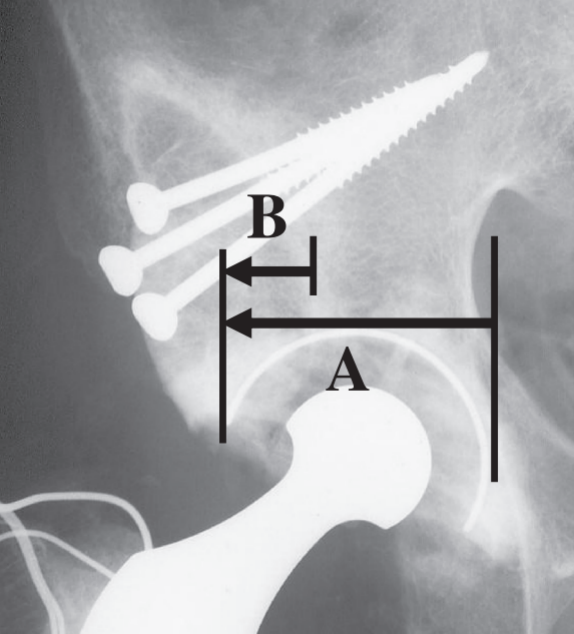

**B**

**A**

Supplement: MOESM1 [file 9510200]
